RESEARCH ARTICLE

# Subsets of Memory CD4<sup>+</sup> T Cell and Bactericidal Antibody Response to *Neisseria meningitidis* Serogroup C after Immunization of HIV-Infected Children and Adolescents

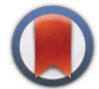

CrossMark  
click for updates

**OPEN ACCESS**

**Citation:** Milagres LG, Costa PR, Silva GP, Carvalho KI, Pereira-Manfro WF, et al. (2014) Subsets of Memory CD4<sup>+</sup> T Cell and Bactericidal Antibody Response to *Neisseria meningitidis* Serogroup C after Immunization of HIV-Infected Children and Adolescents. PLoS ONE 9(12): e115887. doi:10.1371/journal.pone.0115887

**Editor:** Mauricio Martins Rodrigues, Federal University of São Paulo, Brazil

**Received:** September 8, 2014

**Accepted:** November 27, 2014

**Published:** December 22, 2014

**Copyright:** © 2014 Milagres et al. This is an open-access article distributed under the terms of the [Creative Commons Attribution License](https://creativecommons.org/licenses/by/4.0/), which permits unrestricted use, distribution, and reproduction in any medium, provided the original author and source are credited.

**Data Availability:** The authors confirm that all data underlying the findings are fully available without restriction. All relevant data are within the paper.

**Funding:** This work was funded by Conselho Nacional de Desenvolvimento Científico e Tecnológico, grants (#573879/2008-7 to EGK and #552497/2011-8 (Edital Casadinho) to LGM and EGK); Fundação de Amparo a Pesquisa do Estado do Rio de Janeiro (#E-26/112.645/2012 to LGM); Fundação de Amparo a Pesquisa do Estado de São Paulo (#2009/54055-5 to EGK); Fogarty Institute of the National Institutes of Health under award number 5R01TW008397 to CBH. PRC received scholarship support from Conselho Nacional de Desenvolvimento Científico e Tecnológico. GSP received scholarship support from Coordenação de Aperfeiçoamento de Pessoal de Nível Superior. The funders had no role in study design, data collection and analysis, decision to publish, or preparation of the manuscript.

**Competing Interests:** One of the co-authors (EGK) is a PLOS ONE Editorial Board member. The authors declare that this does not alter their adherence to PLOS ONE Editorial policies and criteria.

**Lucimar G. Milagres<sup>1\*</sup>, Priscilla R. Costa<sup>2</sup>, Giselle P. Silva<sup>1</sup>, Karina I. Carvalho<sup>2</sup>, Wânia F. Pereira-Manfro<sup>1</sup>, Bianca Ferreira<sup>4</sup>, Daniella M. Barreto<sup>4</sup>, Ana Cristina C. Frota<sup>4</sup>, Cristina B. Hofer<sup>3,4</sup>, Esper G. Kallas<sup>2</sup>**

**1.** State University of Rio de Janeiro, Department of Microbiology, Immunology and Parasitology, Rio de Janeiro, RJ, Brazil, **2.** Division of Clinical Immunology and Allergy, School of Medicine, University of São Paulo, São Paulo, SP, Brazil, **3.** Instituto de Puericultura e Pediatria Martagão Gesteira – Federal University of Rio de Janeiro, Rio de Janeiro, RJ, Brazil, **4.** Preventive Medicine Department, School of Medicine – Federal University of Rio de Janeiro, Rio de Janeiro, RJ, Brazil

\*[lucimar@uerj.br](mailto:lucimar@uerj.br)

## Abstract

Meningococcal disease is endemic in Brazil, with periodic outbreaks and case fatality rates reach as high as 18 to 20% of cases. Conjugate vaccines against meningococci are immunogenic in healthy children. However, we have previously shown a poor bactericidal antibody response to a Men C conjugate vaccine in Brazilian HIV-infected children and adolescents after a single vaccine administration. The goal of the present work was to investigate associations between bactericidal antibody response induced by MenC vaccine and the frequency and activation profile (expression of CD38, HLA-DR and CCR5 molecules) of total CD4<sup>+</sup> memory T cell sub-populations in HIV-1-infected children and adolescents. Responders to vaccination against MenC had a predominance (about 44%) of CD4<sup>+</sup> T<sub>INTERMEDIATE</sub> subset followed by T<sub>TRANSITIONAL</sub> memory subset (23 to 26%). Importantly, CD4<sup>+</sup> T<sub>INT</sub> frequency was positively associated with bactericidal antibody response induced by vaccination. The positive correlation persisted despite the observation that the frequency T<sub>INT</sub> CD38<sup>+</sup>HLA-DR<sup>+</sup> was higher in responders. In contrast, CD4<sup>+</sup> T<sub>CENTRAL MEMORY</sub> (T<sub>CM</sub>) subset negatively correlated with bactericidal antibodies. In conclusion, these data indicate that less differentiated CD<sup>+</sup> T cells, like T<sub>CM</sub> may be constantly differentiating into intermediate and later differentiated CD4<sup>+</sup> T cell subsets. These

include CD4 T<sub>INT</sub> subset which showed a positive association with bactericidal antibodies.

## Introduction

The development of immune memory mediated by T lymphocytes is central to durable, long-lasting protective immunity. A key issue is how to direct the generation and persistence of memory T cells and to elicit the effective secondary responses to protect against a given pathogen [1, 2]. This is particularly important in the setting of people living with HIV, where CD4<sup>+</sup> T cells are the main target of viral replication and suffer from bystander activation [3, 4].

Meningococcal disease (MD) is endemic in Brazil, with periodic outbreaks [5] and an incidence rate of 1.4–2.5 cases per 100,000 inhabitants [5]. Case fatality rates reach as high as 18 to 20% of cases [5, 6]. Since 2000, Brazil has experienced an increase in serogroup C MD. In 2013, MD accounted for 70% of reported cases to the Brazilian Ministry of Health [6]. In 2006, the Brazilian National Immunization Program suggested that one dose of the conjugate vaccine against *N. meningitidis* serogroup C (MenC) should be given to all HIV-infected children aged 2 to 13 years-old [7].

Conjugate vaccines against meningococci are immunogenic in healthy children [8]. The majority of available immunogenicity studies have demonstrated the induction of antigen-specific memory cells indirectly through the measurement of recall antibody response to a booster dose of vaccine administered long after the primary vaccine series [8]. We have previously shown a poor bactericidal antibody response to a Men C conjugate vaccine in Brazilian HIV-infected children and adolescents after a single vaccine administration [9]. In a second study [10], we demonstrated that pre-existing higher CD4<sup>+</sup> T cell activation leads to poor MenC vaccine response in children living with HIV.

Memory CD4<sup>+</sup> and CD8<sup>+</sup> T cells have distinct phenotypes and differentiation status [11, 12]. Flow cytometry T cell phenotyping allows the identification of five subsets of memory cells: T central memory (T<sub>CM</sub>), T transitional memory (T<sub>TM</sub>), T intermediary memory (T<sub>INT</sub>), T effector memory (T<sub>EM</sub>) and T effector cells (T<sub>Eff</sub>) based on CD45RA, CCR7 and CD27 proteins expression [11, 12]. Burgers et al [11] ranked the CD8<sup>+</sup> T cell memory subpopulations based on the predicted ability to survive and proliferate from highest to lowest: T<sub>Naive</sub> → T<sub>CM</sub> → T<sub>TM</sub> → T<sub>INT</sub> → T<sub>EM</sub> → T<sub>Eff</sub>. However, this lineage differentiation is not fixed, specially for CD4<sup>+</sup> T cells which show a inherent plasticity [2]. Immune hyperactivation, skewed T-cell differentiation, senescence, exhaustion, anergy and loss of functionality are hallmarks of progressive HIV-1 infection [13, 14].

The goal of the present work was to investigate associations between bactericidal antibody response induced by MenC vaccine and the frequency and

activation profile of total CD4<sup>+</sup> memory T cell sub-populations in HIV-1-infected children and adolescents.

## Materials and Methods

### Ethics statement

This study was approved by the *Instituto de Puericultura e Pediatria Martagão Gesteira, Universidade Federal do Rio de Janeiro* (IPPMG/UFRJ), Institutional Review Board (IRB, number 24/09) and Brazilian Ministry of Health Ethics Commission (*Comissão Nacional de Ética em Pesquisa, CONEP*, number 15578).

### Study design and population

We conducted a prospective cohort study at the *Instituto de Puericultura e Pediatria Martagão Gesteira, Universidade Federal do Rio de Janeiro* (IPPMG/UFRJ), Rio de Janeiro, Brazil, to investigate the seroconversion rate after MenC vaccination in HIV-vertically infected 2–18 year-old children. Participants were enrolled between January 2011 and December 2012, meeting the following eligibility criteria: evidence of HIV infection at the moment of the study enrollment; CD4<sup>+</sup>T cell count  $\geq 350$  cells/ $\mu$ l or  $\geq 15\%$ ; no evidence of other cause for severe immune suppression; and no antibiotic use within 2 weeks prior to immunization. With one exception (one individual who responded to the vaccine), all individuals were receiving HAART (defined as three different antiretrovirals, from at least two different drug classes) for more than 3 months. All participant's parents or legal guardians provided written informed consent, as well as the participants who were aware of their HIV-infection status.

### Study protocol

For all participants who met the inclusion and exclusion criteria, the research physician at IPPMG HIV/AIDS Pediatric Clinic approached the patient and their parent or legal guardian offering to participate in this study. After voluntary acceptance and signature of the IRB-approved Informed Consent, the study team checked the eligibility criteria, collected baseline clinical samples and administered an intramuscular injection of MenC vaccine (Novartis; C Polysaccharide/CRM<sub>197</sub>) at the recommended dose (10  $\mu$ g/0.5 ml). Blood samples were collected before (Visit 1) and 1 to 2 months after immunization (Visit 2). Heparin-treated tubes or in the absence of anti-coagulant were used and processed within 3 hours after the blood draw. Peripheral blood mononuclear cells (PBMC) were separated by density-gradient centrifugation over Histopaque (Sigma, St Louis, USA) and stored in RPMI/20% fetal bovine serum/10% DMSO in liquid nitrogen until the day of the assays. Serum samples were stored at  $-70^{\circ}\text{C}$  or  $-20^{\circ}\text{C}$  until the day of anti-MenC antibody titers measurements.

## Bactericidal assay

Serum bactericidal antibody titers were measured as previously described [15]. Briefly, the final reaction mixture contained 25  $\mu$ l of diluted test serum, previously heat inactivated at 56°C for 30 min, 12.5  $\mu$ l of human serum without detectable intrinsic bactericidal activity as a complement source, and 12.5  $\mu$ l of log phase meningococci (about  $5 \times 10^3$  CFU/ml). The bactericidal reaction was carried out at 37°C for 60 min. The bactericidal titer was defined as the reciprocal of the serum dilution causing  $\geq 50\%$  killing.

In this study, seroconversion was defined as a  $\geq 4$ -fold increase in serum bactericidal antibody titers after vaccination. This criterion was utilized to define the two groups of participants: those with documented seroconversion (Sc+) and those without seroconversion (Sc-). We randomly selected 18 participants who responded (Sc+) to the vaccine and 18 who did not respond (Sc-) after immunization against MenC.

Two local strains of MenC were used as target strains: N79/96 (C:2b:P1.10) and N753/00 (C:23:P1.14-6), both kindly provided by Adolfo Lutz Institute, Bacteriology Section, São Paulo, SP, Brazil.

## Flow Cytometry

Flow cytometry assays were performed at the *Laboratório de Investigação Médica 60*, Division of Clinical Immunology and Allergy, School of Medicine, University of São Paulo, as previously described [10].

Briefly, frozen PBMCs were quickly thawed in a 37°C water bath, cells were counted, and  $10^6$  cells were stained with phycoerythrin (PE)-Texas Red-conjugated CD3 (clone UCHT1); Pacific blue-conjugated CD4 (clone RPA-T4), PE-conjugated CD27 (clone L128), FITC-conjugated CD45RA (clone L48), PE-Cy7-conjugated CCR7 (clone 3D12), PerCP-Cy5.5-conjugated CD38 (clone HIT2); APC-conjugated CCR5 (clone 2D7/CCR5); Alexa 700-conjugated HLA-DR (clone G46-6). For all mAbs, fluorescence-minus-one (FMO) controls were used to determine positive and negative boundaries. Fluorescence compensation was calculated with the signals from fluorochrome monoclonal antibodies linked to CompBeads (BD). Samples were run in a FACSFortessa flow cytometer (BD Biosciences) and data were stored using Diva Software for further analyses. Fig. 1 shows representative dot plots with the strategies of analyses used to gate the different T cell populations described in this study.

## Statistical analysis

Flow cytometry graphs were generated using FlowJo software, version 7.6.4 (Tree Star Inc., Ashland, OR). Statistical analyses were performed using STATA program, version 9.0 (Texas, USA). Data were expressed as median values and statistical analysis of significance was calculated using non-parametric Kruskal-Wallis test. All tests were two-tailed, and a  $P < 0.05$  was considered as significant.

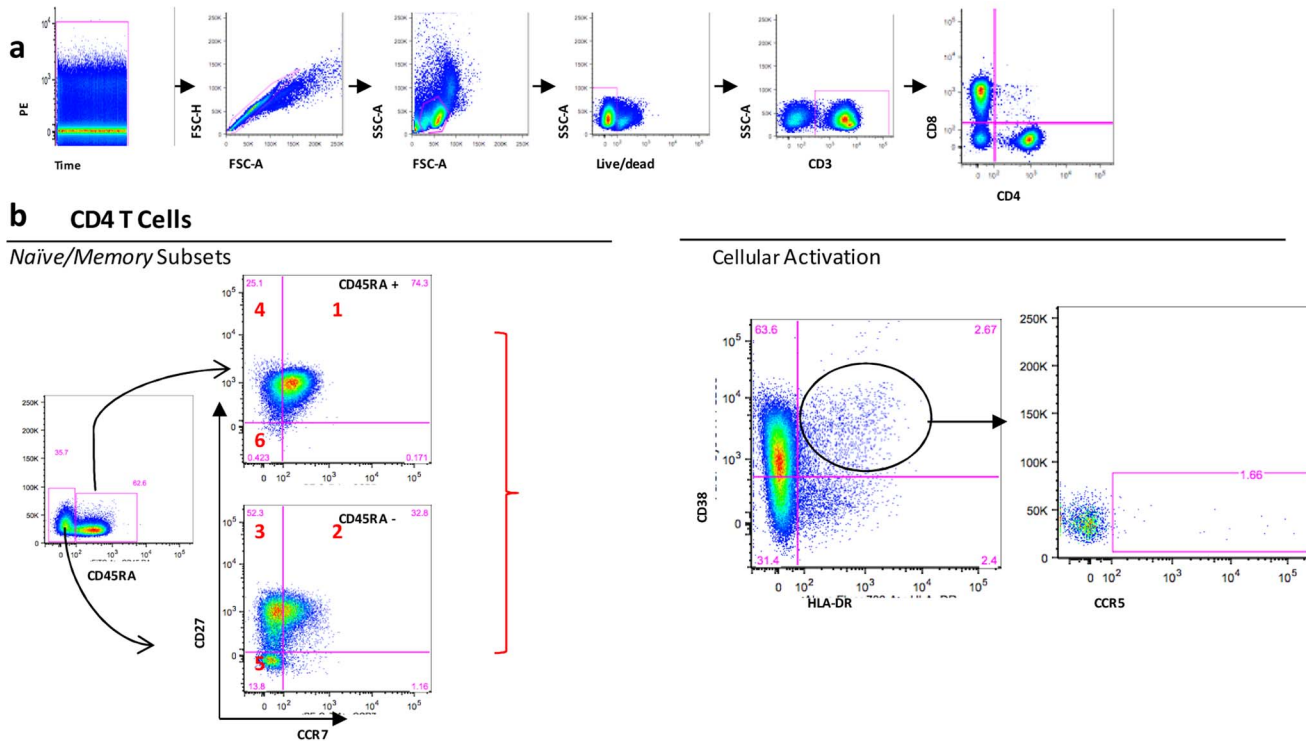

**Fig. 1. Strategy of analysis of Flow Cytometer data from one representative experiment with PBMC samples of HIV infected children.** (A) Were used high Quality Parameters: (Time x PE-to check laser status; Singlets-to exclude the doublets cells; SSC x FSC- to choose lymphocytes subset; Live/Dead-to exclude the dead cells; gate SSC x CD3- to chose T lymphocytes and gate CD4 x CD8- to separate in CD4 and CD8 T subsets, then b Naïve/Memory subsets and cellular activation were evaluated in CD4 T Cells and CD8 T Cells, (B) Naïve/Memory CD4<sup>+</sup> Subsets were classified through differentiated expression of three markers (CD45RA, CD27 and CCR7): 1- Naïve (CD45RA<sup>+</sup>CD27<sup>+</sup>CCR7<sup>+</sup>); 2- Central Memory (CD45RA<sup>-</sup>CD27<sup>+</sup>CCR7<sup>+</sup>); 3- Transitory Memory (CD45RA<sup>-</sup>CD27<sup>+</sup>CCR7<sup>-</sup>); 4- Intermediary Memory (CD45RA<sup>+</sup>CD27<sup>+</sup>CCR7<sup>-</sup>); 5- Effector Memory (CD45RA<sup>-</sup>CD27<sup>-</sup>CCR7<sup>-</sup>); 6- Effector (CD45RA<sup>+</sup>CD27<sup>-</sup>CCR7<sup>-</sup>); Cellular Activation were characterized through expression of CD38, HLA-DR and CCR5.

doi:10.1371/journal.pone.0115887.g001

The correlation between different measurements of immune response was analyzed using Spearman rank test, after graph analyses.

## Results

Previously published data [10] showed no significant differences in age, length of HAART, CDC clinical category and viral load between Sc<sup>+</sup> and Sc<sup>-</sup> groups. Despite a higher nadir and current CD4<sup>+</sup> T-cell counts in responders, the differences did not reach significant levels. There were no significant correlations between bactericidal titer and age, *nadir* CD4<sup>+</sup> T-cell count/percentage or CD4<sup>+</sup> T-cell count/percentage or viral load at the time of vaccination.

### CD4<sup>+</sup> Intermediate memory T-cell predominates in responders

Fig. 2 shows the proportion of six total CD4<sup>+</sup> T cell subpopulations in PBMC collected prior (V1) and 1 to 2 months after vaccination (V2) from individuals who seroconverted (Sc<sup>+</sup>) or not (Sc<sup>-</sup>) after vaccination against MenC. There were

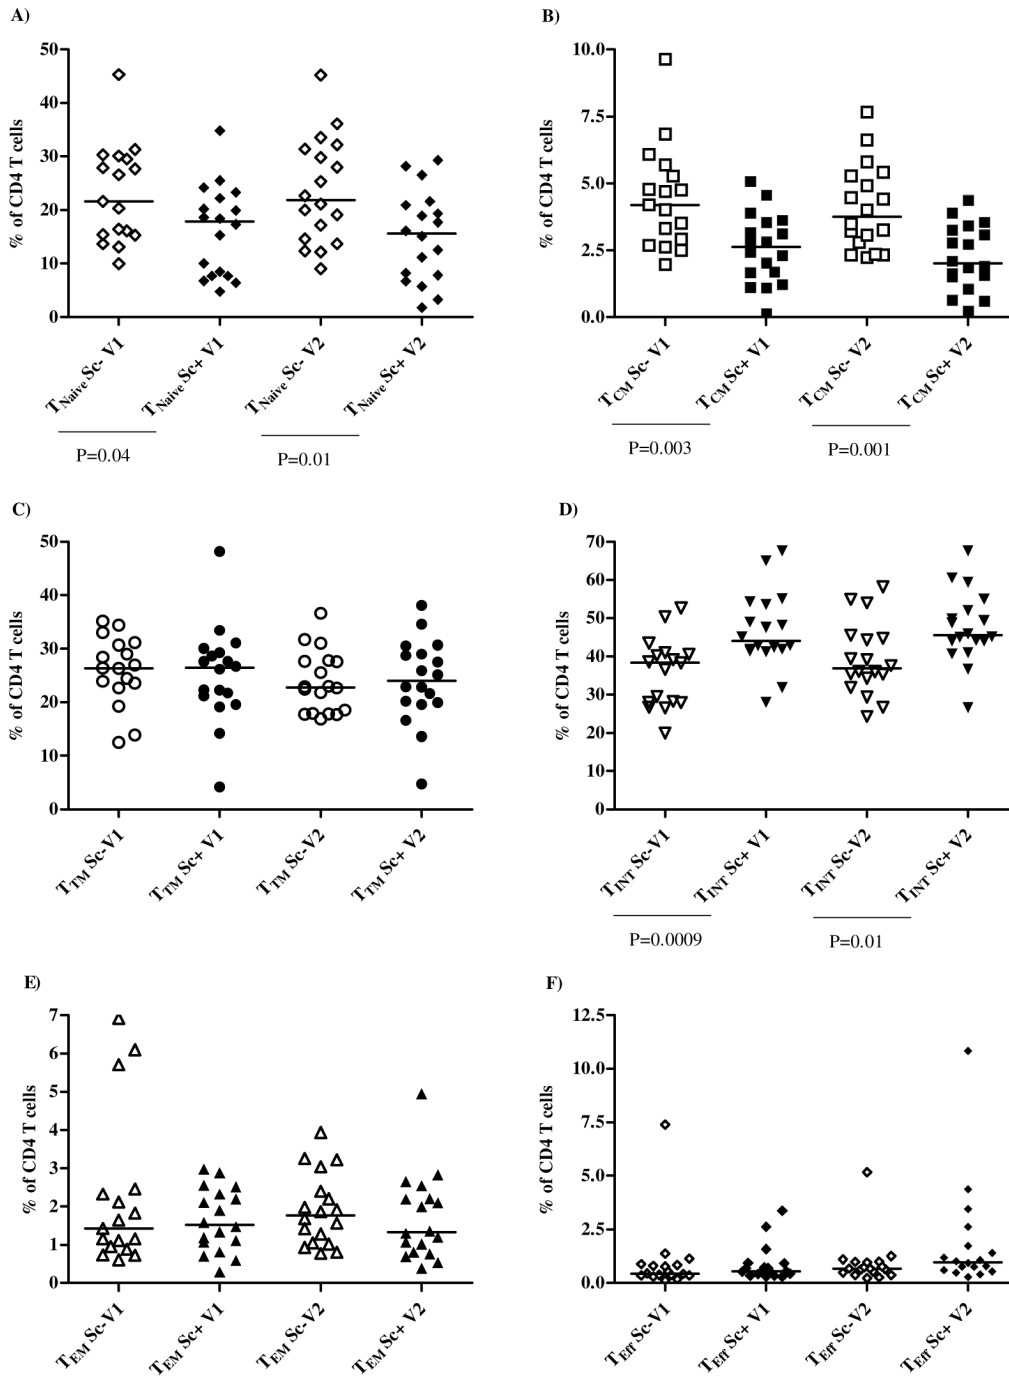

**Fig. 2. Predominance of CD4<sup>+</sup> T<sub>INT</sub> memory subset among HIV<sup>+</sup> seroconverters.** Frequency and median (lines) of CD4<sup>+</sup> T<sub>Naive</sub> (A), T<sub>CM</sub> (B), T<sub>TM</sub> (C), T<sub>INT</sub> (D), T<sub>EM</sub> (E) and T<sub>Eff</sub> (F) subpopulations in seroconverters (Sc+, closed symbols) and non-seroconverters (Sc-, open symbols) before (V1) and after (V2) vaccination.

doi:10.1371/journal.pone.0115887.g002

no significant differences between V1 and V2 for all T cell subsets analysed and represented in [Fig. 2](#). Below we describe the median and p-values for V1 samples.

As observed in [Fig. 2](#), T<sub>INT</sub> subset ([Fig. 2D](#)) showed a greater proportion ( $P < 0.01$ ) in both Sc<sup>+</sup> and Sc<sup>-</sup> individuals than the other five CD4<sup>+</sup> T cell subsets. The frequency of T<sub>INT</sub> was higher in Sc<sup>+</sup> (median of 44%) than in Sc<sup>-</sup> group (median of 38%,  $P < 0.01$ ). In contrast, Sc<sup>+</sup> group had less T<sub>Naive</sub> cells (median of 18%,  $P = 0.04$ , [Fig. 2A](#)) than the Sc<sup>-</sup> group (median of 22%). Of note, T<sub>CM</sub> levels ([Fig. 2B](#)) were significantly smaller in Sc<sup>+</sup> group (median of 2.6%) compared with the Sc<sup>-</sup> group (median of 4.2%,  $P < 0.01$ ). After T<sub>INT</sub>, T<sub>TM</sub> ([Fig. 2C](#)) was the second in frequency (median varying from 23% to 26%) among the six CD4<sup>+</sup> T cell subsets, but did not differ between the two vaccinee groups. Finally, the effector arms of CD4<sup>+</sup> T cells, T<sub>EM</sub> and T<sub>Eff</sub> cells ([Fig. 2E and 2F](#), respectively) presented a median of ~1.5% and ~0.7%, respectively, without significant differences between groups. Therefore, these data indicate contrasting frequency of T<sub>INT</sub> (higher) and T<sub>CM</sub> (lower) CD4<sup>+</sup> T cell subpopulations in individuals who seroconverted compared to those who did not.

### Immune activation levels of CD4<sup>+</sup> T cell subsets

We next evaluated the frequency of expression of molecules associated with CD4<sup>+</sup> T cells activation; CD38, HLA-DR (hereafter described as DR) and CCR5 ([Table 1](#)). In the Sc<sup>-</sup> group, T<sub>TM</sub> was the subset of CD4<sup>+</sup> T memory cells with the highest ( $P < 0.01$ ) expression of CD38 and DR (median of 0.79%) followed by T<sub>INT</sub> (median of 0.49%) and T<sub>EM</sub> (median of 0.42%). For Sc<sup>+</sup> individuals we observed a similar profile as described for Sc<sup>-</sup> except that the activation of T<sub>TM</sub> (median 0.98%) and T<sub>INT</sub> (median of 0.78%) were statistically similar due to a higher ( $P = 0.02$ ) frequency of activated T<sub>INT</sub> subset compared with Sc<sup>-</sup>. In both groups, T<sub>CM</sub> was the less activated CD4<sup>+</sup> T cell subset (median of 0.07%).

When analyzing the proportion of triple positive cells, CD38<sup>+</sup>DR<sup>+</sup>CCR5<sup>+</sup>, we found a similar distribution for T<sub>INT</sub> (median of 0.015%), T<sub>TM</sub> (median of 0.020%) and T<sub>EM</sub> (median of 0.018%) subsets in Sc<sup>-</sup> group. Similar results were found for Sc<sup>+</sup> group except for T<sub>TM</sub> (median of 0.02%) which was more frequently ( $P < 0.01$ ) activated than T<sub>EM</sub> (median of 0.01%). Again, T<sub>CM</sub> was the less activated CD4<sup>+</sup> T cell subset in both study groups. Comparing Sc<sup>+</sup> versus Sc<sup>-</sup>, it was detected that more T<sub>EM</sub> and T<sub>Naive</sub> cells were activated in Sc<sup>-</sup> group ( $P = 0.02$ ).

Finally, the expression of only CCR5 by CD4<sup>+</sup> T cell subsets was higher for all subsets of T cell memory in Sc<sup>-</sup> group compared with Sc<sup>+</sup> one. T<sub>Naive</sub> cells of individuals from both groups had similar frequency of CCR5<sup>+</sup> cells ([Table 1](#)).

Briefly, these data indicated that more differentiated memory T cell subsets showed higher immune activation than less differentiated T cells (T<sub>Naive</sub> and T<sub>CM</sub>). T<sub>INT</sub> subset expressing CD38 and DR was more frequent in individuals who seroconverted.

**Table 1.** Frequency (median) of CD4<sup>+</sup> T cell subsets expressing different combinations of CD38, HLA-DR and CCR5 molecules in PBMC collected before vaccination (V1).

| CD4 <sup>+</sup> T cell subsets | CD38 <sup>+</sup> DR <sup>+</sup> |       | CD38 <sup>+</sup> DR <sup>+</sup> CCR5 <sup>+</sup> |       | CD38 <sup>-</sup> DR <sup>-</sup> CCR5 <sup>+</sup> |       |
|---------------------------------|-----------------------------------|-------|-----------------------------------------------------|-------|-----------------------------------------------------|-------|
|                                 | Sc-                               | Sc+   | Sc-                                                 | Sc+   | Sc-                                                 | Sc+   |
| T <sub>Naive</sub>              | 0.23                              | 0.20  | 0.009*                                              | 0.006 | 0.003                                               | 0.002 |
| T <sub>CM</sub>                 | 0.07                              | 0.07  | 0.002                                               | 0.001 | 0.004*                                              | 0.001 |
| T <sub>TM</sub>                 | 0.79                              | 0.90  | 0.020                                               | 0.015 | 0.112*                                              | 0.047 |
| T <sub>INT</sub>                | 0.49                              | 0.78* | 0.015                                               | 0.018 | 0.016*                                              | 0.011 |
| T <sub>EM</sub>                 | 0.42                              | 0.43  | 0.018*                                              | 0.010 | 0.062*                                              | 0.039 |
| E <sub>ff</sub>                 | 0.11                              | 0.11  | 0.004                                               | 0.002 | 0.006*                                              | 0.003 |

Seroconvertors (Sc+), Non-seroconvertors (Sc-).

\*p-value <0.05 comparing Sc- versus Sc+

doi:10.1371/journal.pone.0115887.t001

### Correlation between CD4<sup>+</sup> T cell subsets and bactericidal antibodies against MenC

After analyses of correlations of all CD4<sup>+</sup> T cell subsets with bactericidal antibody titers (V2) we found a significant positive correlation ( $r=0.52$ ,  $P<0.01$ ) only with T<sub>INT</sub> subset in V1 (Fig. 3A). This finding may indicate that this CD4<sup>+</sup> T cell subset is essential in mounting an effective vaccine response. A positive correlation ( $r=0.42$ ,  $P=0.01$ ) was still seen when analyzing activated (CD38<sup>+</sup>DR<sup>+</sup>) T<sub>INT</sub> cells (V1) and bactericidal antibodies (Fig. 3B), indicating that HAART may be successfully limiting the excessive activation of these cells.

A negative correlation ( $r=-0.47$ ,  $P<0.01$ ) was detected between T<sub>CM</sub> subset and bactericidal antibodies for both V1 (Fig. 4A) and V2 samples (data not shown). Fig. 4B shows that T<sub>CM</sub> expressing only CD38 (median of 1.9%, data not shown) correlated negatively ( $r=-0.38$ ,  $P=0.02$ ) with bactericidal antibodies. Similar result was found for V2 samples (median of 4.1%, data not shown). These data suggests that activation of a less differentiated cell, like T<sub>CM</sub>, have a significant effect in curbing CD4<sup>+</sup> T cell function.

Negative correlations with bactericidal antibodies were also detected for T<sub>Naive</sub> and T<sub>EM</sub> triple positive (CD38<sup>+</sup>DR<sup>+</sup>CCR5<sup>+</sup>) cells (Fig. 5 A and B) for both samples V2 and V1, suggesting that concomitant expression of CD38, HLA-DR and CCR5 have a significant impact in T cells, independent of the differentiation status of the cells.

### Discussion

It is widely accepted that quality, rather than quantity, of CD4<sup>+</sup> and CD8<sup>+</sup> T cell responses is more important in viral control and response to vaccines [2, 11, 12]. Phenotype and function of T cells are integrally linked, and reports have shown that stages of HIV-specific CD8<sup>+</sup> T cell differentiation may be an important qualitative assessment [11, 12]. Similarly, identity of CD4<sup>+</sup> T cell quality and its correlation with bactericidal antibody response may be important for a more



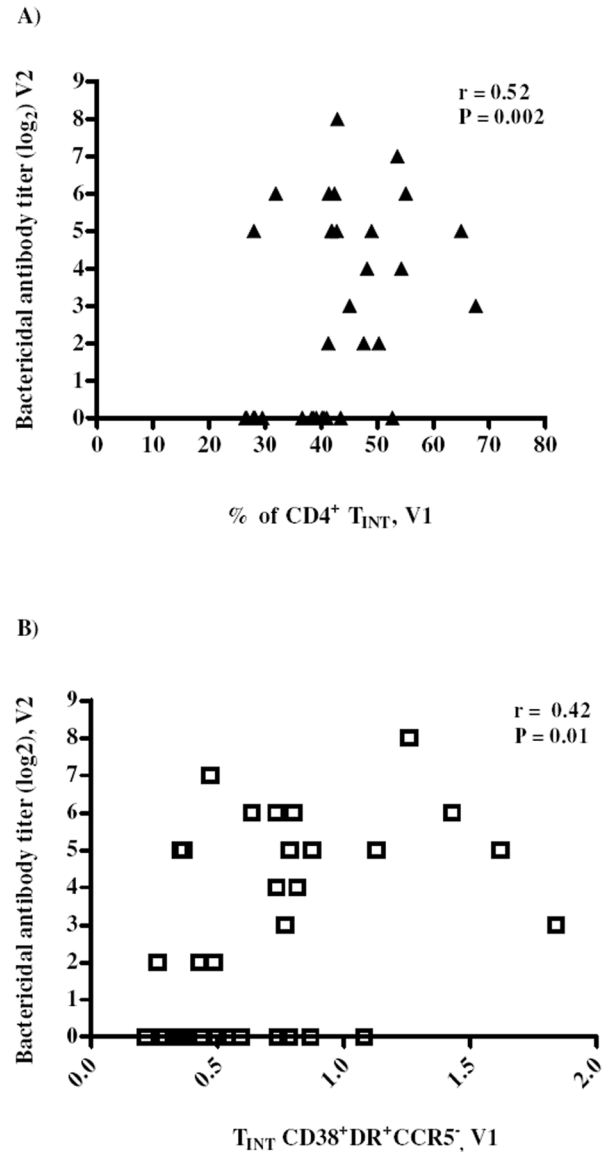

**Fig. 3. CD4<sup>+</sup> T<sub>INT</sub> memory subset correlates positively with bactericidal titers.** (A) positive correlation between CD4<sup>+</sup> T<sub>INT</sub> frequency and (B) CD4<sup>+</sup> T<sub>INT</sub> CD38<sup>+</sup>DR<sup>+</sup>R5<sup>-</sup> frequency before vaccination (V1) with post-vaccination bactericidal titers (V2). Correlations were analyzed using Spearman rank test.

doi:10.1371/journal.pone.0115887.g003

rational use of vaccines against meningococci. Functional and usually high-affinity class-switched antibodies and memory B cells are products of the germinal center (GC). The CD4<sup>+</sup> T cell help required for the development and maintenance of the GC is delivered by follicular Th cells (TFH), a CD4<sup>+</sup> Thelper cell subset characterized by expression of Bcl-6 and secretion of IL-21 [16]. The cellular interactions that mediate differentiation of TFH and GC B cells remain an important area of investigation but a positive association between neutralizing antibodies and TFH cells after vaccination against H1N1 has been described [17].

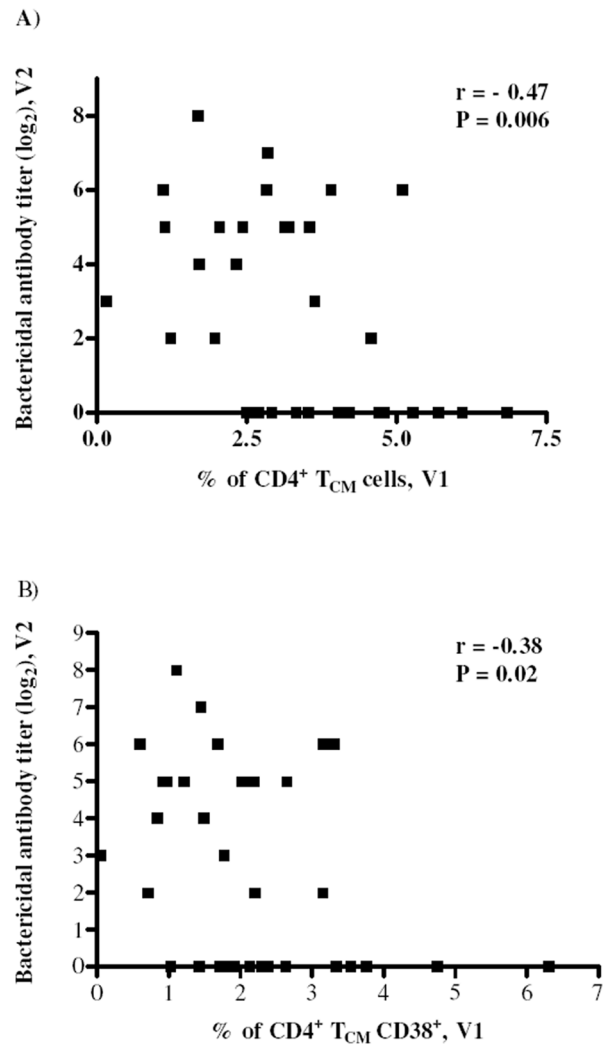

**Fig. 4. CD4<sup>+</sup> T<sub>CM</sub> memory subset correlates negatively with bactericidal antibody titers.** Negative correlation between the frequency of CD4<sup>+</sup> T<sub>CM</sub> cells (A) and CD4<sup>+</sup> T<sub>CM</sub> cells expressing CD38 (B) before vaccination (V1) with post-vaccination bactericidal antibody titers (V2). Correlations were analyzed using Sperman rank test.

doi:10.1371/journal.pone.0115887.g004

The focus of this study was to investigate correlations between CD4<sup>+</sup> T cell memory subsets and bactericidal antibody response after vaccination against MenC. Further investigations will be necessary to associate CD4<sup>+</sup> T cell memory subsets and memory TFH cells.

In our study, HIV-infected children and adolescents who responded to vaccination against MenC had a predominance (about 44%) of CD4<sup>+</sup> T<sub>INT</sub> subset followed by T<sub>TM</sub> subset (23 to 26%). As described by Burgers et al [11], T<sub>INT</sub> cells are CD45RA<sup>+</sup>CD27<sup>+</sup>CCR7<sup>-</sup>, with few cells expressing CD57 (a marker of replicative senescence), and the proportion of cells expressing CD127 (the IL-7 receptor) are intermediate between T<sub>CM</sub> and T<sub>EM</sub>. The use of CD27 is important to differentiate T<sub>INT</sub> and T<sub>Eff</sub> subset (CD45RA<sup>+</sup>CD27<sup>-</sup>CCR7<sup>-</sup>). Without CD27

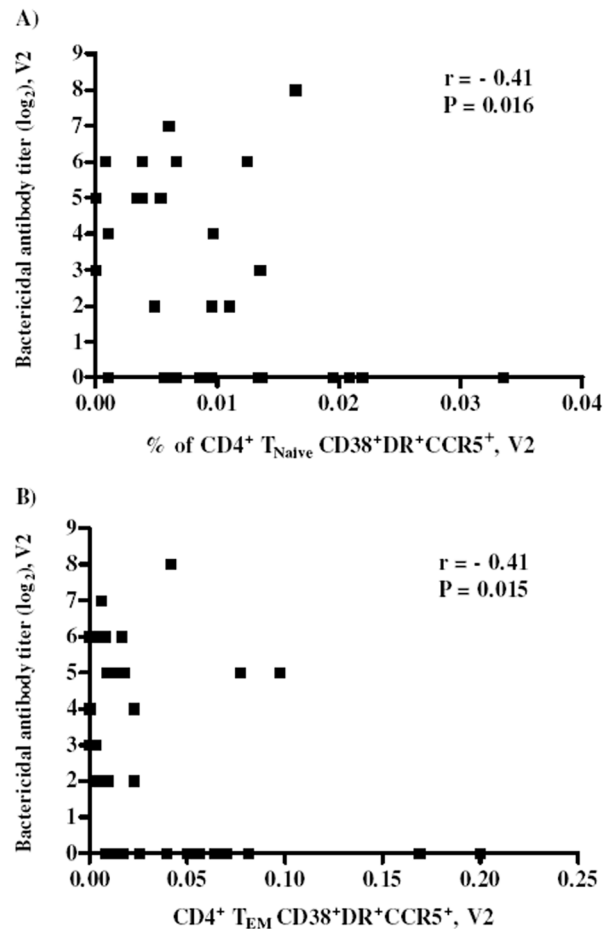

**Fig. 5. Triple positive CD4<sup>+</sup> T cells negatively correlates with bactericidal antibody titers.** CD4<sup>+</sup> T<sub>NAIVE</sub> (A) and T<sub>EM</sub> (B) T cells with CD38<sup>+</sup>DR<sup>+</sup>CCR5<sup>+</sup> phenotype correlates negatively with post-vaccination bactericidal titers (V2). Correlations were analyzed using Spearman rank test.

doi:10.1371/journal.pone.0115887.g005

marker we would have only a population of CD4<sup>+</sup>CD45RA<sup>+</sup>CCR7<sup>-</sup> cells termed T<sub>Eff</sub> or terminally differentiated effector cells (T<sub>EMRA</sub>), a subset highly heterogeneous in terms of CD27 and CD57 expression. Therefore the use of CD27 allowed us to distinguish between cells that may be functionally diverse. In fact, this study showed a positive correlation between the frequency of T<sub>INT</sub> but not T<sub>Eff</sub> subset and bactericidal antibody response to MenC.

Breton et al [10] using similar markers, except for CD27, did not select the T<sub>INT</sub> subset and described similar frequencies of CD4<sup>+</sup> T<sub>CM</sub> and T<sub>TM</sub> (about 17%), similar proportions of CD4<sup>+</sup> T<sub>EM</sub> and T<sub>Eff</sub> (about 8%) and approximately 33% of CD4<sup>+</sup> T<sub>Naive</sub> cells in HIV uninfected individuals. In contrast, our data showed that the frequency of CD4<sup>+</sup> T<sub>CM</sub> subset was substantially low, peculiarly to responders compared to non-responders. Low number of CD4<sup>+</sup> T<sub>Naive</sub> cells was also detected in MenC vaccine responders. This shift toward a more differentiated T cell phenotype (T<sub>INT</sub> and T<sub>TM</sub>) in responders may reflect a continuing priming of

naïve T cells and their differentiation into a large population of intermediate and end-stage effector cells.

Burgers et al [11] described similar frequencies (~10%) of CD8<sup>+</sup> T<sub>TM</sub>, T<sub>INT</sub> and T<sub>EM</sub> in HIV-exposed women. The lowest subpopulation being T<sub>CM</sub> (less than 5%) and the highest (~35%) the T<sub>EFF</sub> subset of memory CD8<sup>+</sup> T cells. Collectively, these data indicate that the frequency of T cell subsets varies according to the population studied and also to the definition of T cell subsets by flow cytometry. To date, we have not found any comprehensive report of CD4<sup>+</sup> T memory subset frequencies in children and adolescents.

Importantly, in the HIV-infected children, CD4<sup>+</sup> T<sub>INT</sub> frequency was positively associated with bactericidal antibody response induced by vaccination. The positive correlation persisted despite the observation that T<sub>INT</sub> subset activation (expression of CD38 and HLA-DR) was higher in responders. However, the frequency of CD38<sup>+</sup>DR<sup>+</sup>CD4<sup>+</sup> T<sub>INT</sub> cells was very low (median of 0.57%, minimum of 0.22% and maximum of 1.8%) which suggests that HAART was able to avoid a continuous activation of these cells. In contrast, CD4<sup>+</sup> T<sub>CM</sub> subset negatively correlated with bactericidal antibodies. The expression of the activation marker CD38 by this subset was also negatively associated with the antibody response. Therefore, our results indicate that the immune activation of CD4<sup>+</sup> T cell memory subsets is heterogeneous and suggest that activation of less differentiated cells (e.g., T<sub>CM</sub>) have more functional impact than activation of more differentiated cells (e.g., T<sub>INT</sub>). Additional studies concerning to the cytokines secreted by these cells, as well as, the search for specific cell markers will be important to evaluate a possible interaction of CD4<sup>+</sup> T cell memory subsets with germinal center B cells.

A similar analysis performed in aviremic-treated individuals [12] showed that HAART was able to restore the distribution of all memory CD4<sup>+</sup> T cell subsets to the frequencies observed in healthy donors. However, HAART failed to restore normal CD8<sup>+</sup> T cell subset frequencies, with persisting disequilibrium shown by lower numbers of T<sub>CM</sub> and higher numbers of T<sub>EM</sub> cell subsets compared with uninfected subjects.

Concluding, the lower frequency of CD4<sup>+</sup> T cells at earlier stages of differentiation (T<sub>Naive</sub> and T<sub>CM</sub>) in responders may indicate a better functional status of these cells and consequently a higher ability to proliferate and differentiate into effector cells after specific stimulus. The accumulation of T<sub>INT</sub> subset in responders and its correlation with bactericidal antibody response indicate the importance to study the effector functions of specific T<sub>INT</sub> cells. These issues should be addressed in future studies.

## Acknowledgments

This study would not be possible without the consent of the volunteers/guardians and patients help. We are in debt with Helena Tomiyama and Claudia Tomiyama for the laboratory activities support.

## Author Contributions

Conceived and designed the experiments: LGM PRC EGK CBH. Performed the experiments: LGM PRC GPS KIC WFPM ACCF BF DMB. Analyzed the data: LGM EGK CBH PRC. Contributed reagents/materials/analysis tools: EGK PRC LGM CBH. Wrote the paper: LGM EGK CBH.

## References

1. Seder RA, Darrah PA, Roederer M (2008) T-cell quality in memory and protection: implications for vaccine design. *Nat Rev Immunol* 8: 247–58.
2. Farber DL, Yudanin NA, Restifo NP (2014) Human memory T cells: generation, compartmentalization and homeostasis. *Nat Rev Immunol* 14: 24–35.
3. Yue FY, Kovacs CM, Dimayuga RC, Parks P, Ostrowski MA (2004) HIV-1-specific memory CD4<sup>+</sup> T cells are phenotypically less mature than cytomegalovirus-specific memory CD4<sup>+</sup> T cells. *J Immunol* 172: 2476–86.
4. Giorgi JV, Hultin LE, McKeating JA, Johnson TD, Owens B, et al. (1999) Shorter survival in advanced human immunodeficiency virus type 1 infection is more closely associated with T lymphocyte activation than with plasma virus burden or virus chemokine coreceptor usage. *J Infect Dis* 179: 859–70.
5. Sáfadi MA, González-Ayala S, Jäkel A, Wieffer H, Moreno C, et al. (2013) The epidemiology of meningococcal disease in Latin America 1945–2010: an unpredictable and changing landscape. *Epidemiol Infect* 141: 447–58.
6. Sáfadi MA, Berezin EN, Oselka GW (2012) A critical appraisal of the recommendations for the use of meningococcal conjugate vaccines. *J Pediatr (Rio J)*. 88: 195–202.
7. Ministério da Saúde. Secretaria de Vigilância em Saúde. Departamento de Vigilância Epidemiológica. Manual dos Centros de Referência para Imunobiológicos Especiais. Série A. Normas e Manuais Técnicos. Brasília; 3.<sup>a</sup> edição—22006.
8. Borrow R, Abad R, Trotter C, van der Klis FR, Vazquez JA (2013) Effectiveness of meningococcal serogroup C vaccine programmes. *Vaccine* 31: 4477–86.
9. Frota AC, Harrison LH, Mena-Barreto D, Silva GP, Cruz AC, et al. In press) Immunogenicity of meningococcal C conjugate vaccine in children and adolescents infected and uninfected with human immunodeficiency virus in Brazil. *Ped Infect Dis J*.
10. Milagres LG, Costa PR, Santos BA, Silva GP, Cruz AC, et al. (2013) CD4<sup>+</sup> T-cell activation impairs serogroup C *Neisseria meningitidis* vaccine response in HIV-infected children. *AIDS* 27: 2697–705.
11. Burgers WA, Riou C, Mlotshwa M, Maenetje P, de Assis Rosa D, et al. (2009) Acute Infection Study Team. Association of HIV-specific and total CD8<sup>+</sup> T memory phenotypes in subtype C HIV-1 infection with viral set point. *J Immunol* 182: 4751–61.
12. Breton G, Chomont N, Takata H, Fromentin R, Ahlers J, et al. (2013) Programmed death-1 is a marker for abnormal distribution of naive/memory T cell subsets in HIV-1 infection. *J Immunol* 191: 2194–2204.
13. Champagne P, Ogg GS, King AS, Knabenhans C, Ellefsen K, et al. (2001) Skewed maturation of memory HIV-specific CD8 T lymphocytes. *Nature* 410: 106–11.
14. Rosignoli G, Cranage A, Burton C, Nelson M, Steel A, et al. (2007) Expression of PD-L1, a marker of disease status, is not reduced by HAART in aviraemic patients. *AIDS* 21: 1379–81.
15. Maslanka SE, Gheesling LL, Libutti DE, Donaldson KB, Harakeh HS, et al. (1997) Standardization and a multilaboratory comparison of *Neisseria meningitidis* serogroup A and C serum bactericidal assays. The Multilaboratory Study Group. *Clin Diagn Lab Immunol* 4: 156–67.
16. Barnett LG, Simkins HM, Barnett BE, Korn LL, Johnson AL, et al. (2014) B cell antigen presentation in the initiation of follicular helper T cell and germinal center differentiation. *J Immunol* 192: 3607–17.

17. **Pallikkuth S, Parmigiani A, Silva SY, George VK, Fischl M, et al.** (2012) Impaired peripheral blood T-follicular helper cell function in HIV-infected nonresponders to the 2009 H1N1/09 vaccine. *Blood* 120: 985–93.
